# Supplementary material for: Genetic Characteristics of Latvian Patients with Familial Hypercholesterolemia: The First Analysis from Genome-Wide Sequencing
Source: MDPI journal article supplement (doi:10.3390/jcm12155160), 2023-08-07
Supplement: s1 [file s1]

Supplementary Materials

**Supplementary Figure S1.** Variant Effect Predictor annotated consequence of detected FH P/LP variants.

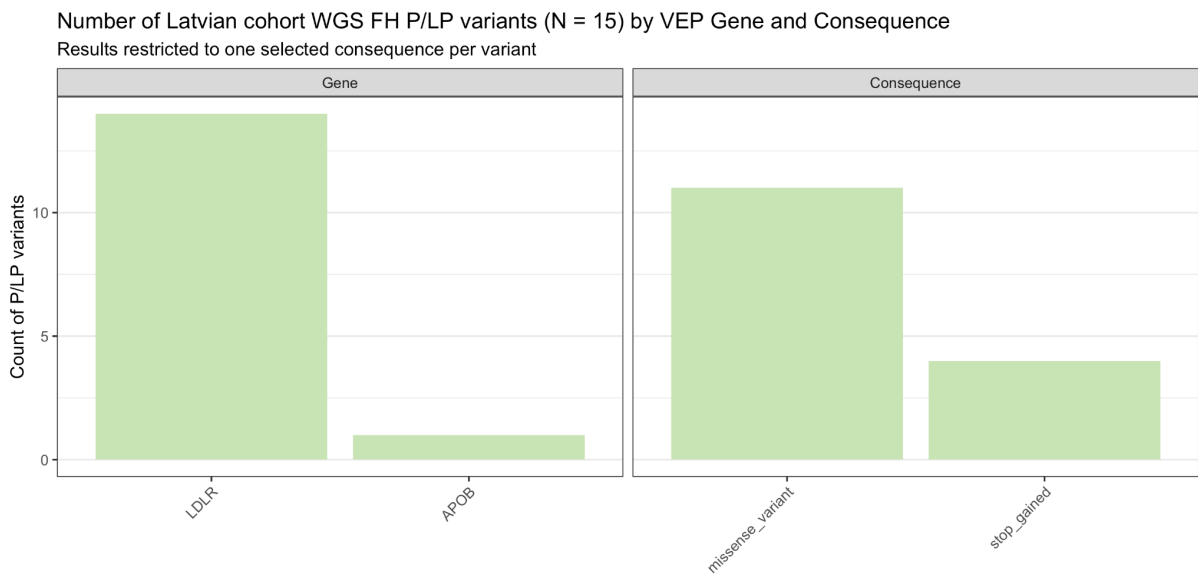

Abbreviations: FH, familial hypercholesterolemia; LP, likely pathogenic; P, pathogenic;  
VEP, Variant Effect Predictor; WGS, whole genome sequencing.

**Supplementary Figure S2. Variant Effect Predictor annotated consequence of detected FH VUS variants, defined with CLNSIG value of Conflicting\_interpretations\_of\_pathogenicity and Uncertain\_significance.**

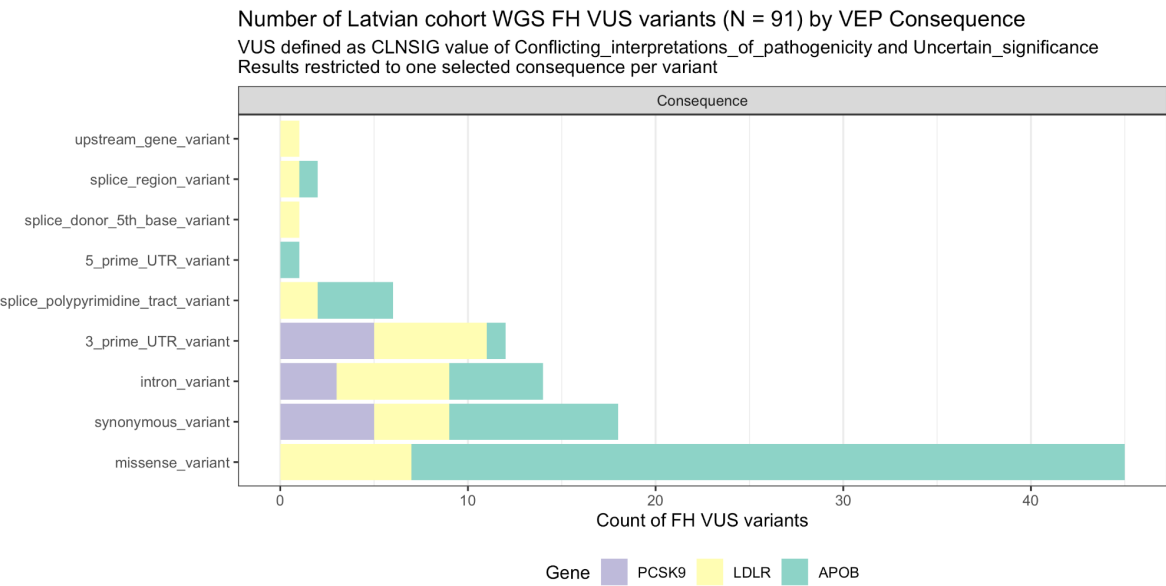

Abbreviations: CLNSIG - clinical significance

**Supplementary Table S1. Variant Effect Predictor annotated consequence of 91 detected**

**FH VUS variants, defined with CLNSIG value of**

**Conflicting\_interpretations\_of\_pathogenicity and Uncertain\_significance.**

| SNP Chr_Start_Ref_Alt | rsID        | ClinVar<br>ID | Gene  | Consequence         | Clinical significance                            |
|-----------------------|-------------|---------------|-------|---------------------|--------------------------------------------------|
| chr1_55039978_C_T     | rs28385701  | 262902        | PCSK9 | synonymous_variant  | Conflicting_interpretations_<br>of_pathogenicity |
| chr1_55052420_G_A     | rs11800243  | 262906        | PCSK9 | intron_variant      | Conflicting_interpretations_<br>of_pathogenicity |
| chr1_55052614_G_A     | rs11800265  | 265930        | PCSK9 | intron_variant      | Uncertain_significance                           |
| chr1_55052697_C_T     | rs7552471   | 265932        | PCSK9 | synonymous_variant  | Conflicting_interpretations_<br>of_pathogenicity |
| chr1_55052712_C_T     | rs41297883  | 242028        | PCSK9 | synonymous_variant  | Conflicting_interpretations_<br>of_pathogenicity |
| chr1_55056233_A_G     | rs67578331  | 265936        | PCSK9 | intron_variant      | Uncertain_significance                           |
| chr1_55057360_A_G     | rs509504    | 262899        | PCSK9 | synonymous_variant  | Conflicting_interpretations_<br>of_pathogenicity |
| chr1_55058082_C_T     | rs146924245 | 413314        | PCSK9 | synonymous_variant  | Conflicting_interpretations_<br>of_pathogenicity |
| chr1_55063612_G_A     | rs189293781 | 297710        | PCSK9 | 3_prime_UTR_variant | Uncertain_significance                           |
| chr1_55063659_C_T     | rs28362287  | 265950        | PCSK9 | 3_prime_UTR_variant | Conflicting_interpretations_<br>of_pathogenicity |
| chr1_55063755_C_T     | rs557622245 | 297716        | PCSK9 | 3_prime_UTR_variant | Conflicting_interpretations_<br>of_pathogenicity |

|                    |             |        |       |                                                                           |                                              |
|--------------------|-------------|--------|-------|---------------------------------------------------------------------------|----------------------------------------------|
| chr1_55064534_C_T  | rs72646537  | 297741 | PCSK9 | 3_prime_UTR_variant                                                       | Uncertain_significance                       |
| chr1_55064636_C_T  | rs149837083 | 297742 | PCSK9 | 3_prime_UTR_variant                                                       | Uncertain_significance                       |
| chr19_11089429_C_T | rs875989886 | 226299 | LDLR  | upstream_gene_variant                                                     | Conflicting_interpretations_of_pathogenicity |
| chr19_11100340_C_T | rs376207800 | 161273 | LDLR  | missense_variant                                                          | Conflicting_interpretations_of_pathogenicity |
| chr19_11105413_C_T | rs146354103 | 36464  | LDLR  | synonymous_variant                                                        | Conflicting_interpretations_of_pathogenicity |
| chr19_11106668_T_A | rs139043155 | 161287 | LDLR  | missense_variant                                                          | Conflicting_interpretations_of_pathogenicity |
| chr19_11110613_C_T | rs55792959  | 251548 | LDLR  | intron_variant                                                            | Conflicting_interpretations_of_pathogenicity |
| chr19_11110697_G_A | rs761954844 | 226344 | LDLR  | missense_variant                                                          | Conflicting_interpretations_of_pathogenicity |
| chr19_11111506_T_C | rs72658861  | 36451  | LDLR  | splice_region_variant, splice_polypyrimidine_tract_variant,intron_variant | Conflicting_interpretations_of_pathogenicity |
| chr19_11113285_C_T | rs13306498  | 224620 | LDLR  | synonymous_variant                                                        | Conflicting_interpretations_of_pathogenicity |
| chr19_11113365_A_T | rs879254850 | 251762 | LDLR  | missense_variant                                                          | Conflicting_interpretations_of_pathogenicity |
| chr19_11113368_T_C | rs879254851 | 251763 | LDLR  | missense_variant                                                          | Conflicting_interpretations_of_pathogenicity |

|                    |             |        |      |                                                    |                                              |
|--------------------|-------------|--------|------|----------------------------------------------------|----------------------------------------------|
| chr19_11113679_G_A | rs368889457 | 251876 | LDLR | synonymous_variant                                 | Conflicting_interpretations_of_pathogenicity |
| chr19_11113778_G_A | rs114891301 | 431533 | LDLR | intron_variant                                     | Conflicting_interpretations_of_pathogenicity |
| chr19_11116849_G_A | rs17248882  | 226368 | LDLR | splice_polypyrimidine_tract_variant,intron_variant | Conflicting_interpretations_of_pathogenicity |
| chr19_11120166_C_T | rs5926      | 237869 | LDLR | synonymous_variant                                 | Conflicting_interpretations_of_pathogenicity |
| chr19_11120527_G_A | rs72658867  | 36460  | LDLR | splice_donor_5th_base_variant,intron_variant       | Conflicting_interpretations_of_pathogenicity |
| chr19_11123210_C_T | rs45508991  | 36461  | LDLR | missense_variant                                   | Conflicting_interpretations_of_pathogenicity |
| chr19_11128020_T_C | rs780300776 | 440691 | LDLR | missense_variant                                   | Conflicting_interpretations_of_pathogenicity |
| chr19_11128126_C_A | rs72658868  | 252310 | LDLR | intron_variant                                     | Conflicting_interpretations_of_pathogenicity |
| chr19_11131335_G_A | rs56270417  | 251525 | LDLR | 3_prime_UTR_variant                                | Conflicting_interpretations_of_pathogenicity |
| chr19_11132572_C_T | rs886054172 | 328090 | LDLR | 3_prime_UTR_variant                                | Uncertain_significance                       |
| chr19_11132685_C_T | rs191796971 | 891604 | LDLR | 3_prime_UTR_variant                                | Uncertain_significance                       |
| chr19_11133109_A_C | rs886054176 | 328109 | LDLR | 3_prime_UTR_variant                                | Uncertain_significance                       |
| chr19_11133448_G_A | rs184187776 | 890105 | LDLR | 3_prime_UTR_variant                                | Uncertain_significance                       |

|                    |             |        |      |                     |                                              |
|--------------------|-------------|--------|------|---------------------|----------------------------------------------|
| chr19_11133526_T_C | rs73925118  | 890680 | LDLR | 3_prime_UTR_variant | Uncertain_significance                       |
| chr2_21001551_G_A  | rs142151703 | 334060 | APOB | 3_prime_UTR_variant | Conflicting_interpretations_of_pathogenicity |
| chr2_21001742_A_G  | rs72654427  | 477801 | APOB | synonymous_variant  | Conflicting_interpretations_of_pathogenicity |
| chr2_21001971_G_A  | rs12713450  | 255978 | APOB | missense_variant    | Conflicting_interpretations_of_pathogenicity |
| chr2_21001981_C_T  | rs1801695   | 128419 | APOB | missense_variant    | Conflicting_interpretations_of_pathogenicity |
| chr2_21002120_G_A  | rs144040999 | 334070 | APOB | synonymous_variant  | Conflicting_interpretations_of_pathogenicity |
| chr2_21002247_C_T  | rs777718986 | 373587 | APOB | missense_variant    | Conflicting_interpretations_of_pathogenicity |
| chr2_21002400_A_T  | rs144018015 | 627769 | APOB | missense_variant    | Uncertain_significance                       |
| chr2_21002482_T_C  | rs72654423  | 237739 | APOB | missense_variant    | Conflicting_interpretations_of_pathogenicity |
| chr2_21002628_A_G  | rs61743502  | 237738 | APOB | missense_variant    | Conflicting_interpretations_of_pathogenicity |
| chr2_21002841_A_G  | rs570782024 | 627659 | APOB | missense_variant    | Conflicting_interpretations_of_pathogenicity |
| chr2_21003040_C_T  | rs1801703   | 384812 | APOB | missense_variant    | Conflicting_interpretations_of_pathogenicity |
| chr2_21003285_C_T  | rs149273387 | 334082 | APOB | missense_variant    | Conflicting_interpretations_of_pathogenicity |

|                   |             |        |      |                                                    |                                              |
|-------------------|-------------|--------|------|----------------------------------------------------|----------------------------------------------|
| chr2_21004445_C_T | rs373477107 | 334088 | APOB | missense_variant                                   | Conflicting_interpretations_of_pathogenicity |
| chr2_21004467_A_T | rs370325726 | 334089 | APOB | splice_polypyrimidine_tract_variant,intron_variant | Conflicting_interpretations_of_pathogenicity |
| chr2_21004631_T_C | rs1801698   | 334091 | APOB | missense_variant                                   | Conflicting_interpretations_of_pathogenicity |
| chr2_21005391_G_A | rs61744153  | 237735 | APOB | missense_variant                                   | Conflicting_interpretations_of_pathogenicity |
| chr2_21005467_A_T | rs12713540  | 237734 | APOB | missense_variant                                   | Conflicting_interpretations_of_pathogenicity |
| chr2_21005858_C_A | rs148127628 | 627682 | APOB | missense_variant                                   | Uncertain_significance                       |
| chr2_21006160_G_A | rs201736972 | 431988 | APOB | missense_variant                                   | Uncertain_significance                       |
| chr2_21006288_C_T | rs5742904   | 17890  | APOB | missense_variant                                   | Conflicting_interpretations_of_pathogenicity |
| chr2_21006360_G_A | rs375284245 | 548033 | APOB | missense_variant                                   | Uncertain_significance                       |
| chr2_21006737_C_T | rs1799812   | 265890 | APOB | synonymous_variant                                 | Conflicting_interpretations_of_pathogenicity |
| chr2_21006985_A_G | rs186299244 | 334108 | APOB | missense_variant                                   | Conflicting_interpretations_of_pathogenicity |
| chr2_21007033_T_C | rs12720854  | 218452 | APOB | missense_variant                                   | Conflicting_interpretations_of_pathogenicity |
| chr2_21007574_G_A | rs145777339 | 334114 | APOB | synonymous_variant                                 | Conflicting_interpretations_of_pathogenicity |

|                   |             |        |      |                    |                                              |
|-------------------|-------------|--------|------|--------------------|----------------------------------------------|
| chr2_21008406_G_A | rs72653095  | 218451 | APOB | missense_variant   | Conflicting_interpretations_of_pathogenicity |
| chr2_21008515_T_G | rs2163204   | 218450 | APOB | missense_variant   | Conflicting_interpretations_of_pathogenicity |
| chr2_21008720_G_A | rs6413458   | 237751 | APOB | synonymous_variant | Conflicting_interpretations_of_pathogenicity |
| chr2_21008734_G_A | rs372245645 | 630608 | APOB | missense_variant   | Uncertain_significance                       |
| chr2_21009172_C_T | rs1801696   | 189300 | APOB | missense_variant   | Conflicting_interpretations_of_pathogenicity |
| chr2_21009253_C_T | rs148170480 | 334125 | APOB | missense_variant   | Conflicting_interpretations_of_pathogenicity |
| chr2_21009583_A_T | rs72653092  | 218448 | APOB | missense_variant   | Conflicting_interpretations_of_pathogenicity |
| chr2_21010732_C_T | rs72653084  | 237748 | APOB | missense_variant   | Conflicting_interpretations_of_pathogenicity |
| chr2_21011005_C_T | rs368970025 | 548062 | APOB | missense_variant   | Conflicting_interpretations_of_pathogenicity |
| chr2_21011802_C_T | rs151009667 | 189304 | APOB | missense_variant   | Conflicting_interpretations_of_pathogenicity |
| chr2_21012043_A_G | rs72653083  | 477809 | APOB | synonymous_variant | Conflicting_interpretations_of_pathogenicity |
| chr2_21015099_G_A | rs148959244 | 252482 | APOB | missense_variant   | Uncertain_significance                       |
| chr2_21015451_G_A | rs72653077  | 237744 | APOB | missense_variant   | Conflicting_interpretations_of_pathogenicity |



|                   |             |        |      |                                                                           |                                              |
|-------------------|-------------|--------|------|---------------------------------------------------------------------------|----------------------------------------------|
| chr2_21015495_C_T | rs12713843  | 281142 | APOB | missense_variant                                                          | Conflicting_interpretations_of_pathogenicity |
| chr2_21015541_C_G | rs12713844  | 218443 | APOB | missense_variant                                                          | Conflicting_interpretations_of_pathogenicity |
| chr2_21016655_C_T | rs72653071  | 255982 | APOB | splice_region_variant, splice_polypyrimidine_tract_variant,intron_variant | Conflicting_interpretations_of_pathogenicity |
| chr2_21019869_C_T | rs151193347 | 334163 | APOB | synonymous_variant                                                        | Conflicting_interpretations_of_pathogenicity |
| chr2_21022941_G_A | rs1801700   | 255981 | APOB | synonymous_variant                                                        | Conflicting_interpretations_of_pathogenicity |
| chr2_21023017_G_A | rs12714097  | 490389 | APOB | missense_variant                                                          | Conflicting_interpretations_of_pathogenicity |
| chr2_21026844_C_T | rs12691202  | 128421 | APOB | missense_variant                                                          | Conflicting_interpretations_of_pathogenicity |
| chr2_21026872_G_A | rs756184175 | 334170 | APOB | synonymous_variant                                                        | Conflicting_interpretations_of_pathogenicity |
| chr2_21029662_G_A | rs13306194  | 255979 | APOB | missense_variant                                                          | Conflicting_interpretations_of_pathogenicity |
| chr2_21032294_G_T | rs12714224  | 265879 | APOB | intron_variant                                                            | Uncertain_significance                       |
| chr2_21032420_A_C | rs766709743 | 925433 | APOB | missense_variant                                                          | Uncertain_significance                       |
| chr2_21033509_T_C | rs199937544 | 627784 | APOB | missense_variant                                                          | Conflicting_interpretations_of_pathogenicity |

|                   |             |        |      |                                                            |                                                  |
|-------------------|-------------|--------|------|------------------------------------------------------------|--------------------------------------------------|
| chr2_21033533_G_C | rs72653061  | 265876 | APOB | splice_polypyrimidine<br>_tract_variant,intron_<br>variant | Conflicting_interpretations_<br>of_pathogenicity |
| chr2_21033534_T_G | rs12720810  | 265877 | APOB | splice_polypyrimidine<br>_tract_variant,intron_<br>variant | Conflicting_interpretations_<br>of_pathogenicity |
| chr2_21043911_A_G | rs758450840 | 897863 | APOB | missense_variant                                           | Uncertain_significance                           |
| chr2_21044060_G_C | rs1800480   | 265871 | APOB | 5_prime_UTR_variant                                        | Conflicting_interpretations_<br>of_pathogenicity |
